# Supplementary material
Source: publisher figshare collection journal article supplement (https://aacr.figshare.com/articles/dataset/_/23569587)

# Supplementary Figure 2. Representative tandem MS spectrum of the QATGIEDGELR peptide from CUL4B as determined by IP-Mass Spec

MEN1.17609.17609.2 File:"MEN1.raw", NativeID:"controllerType=0 controllerNumber=1 scan=17609" Seq: QATGIEDGELR

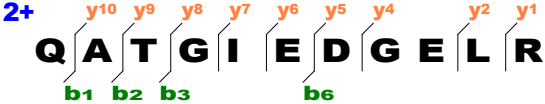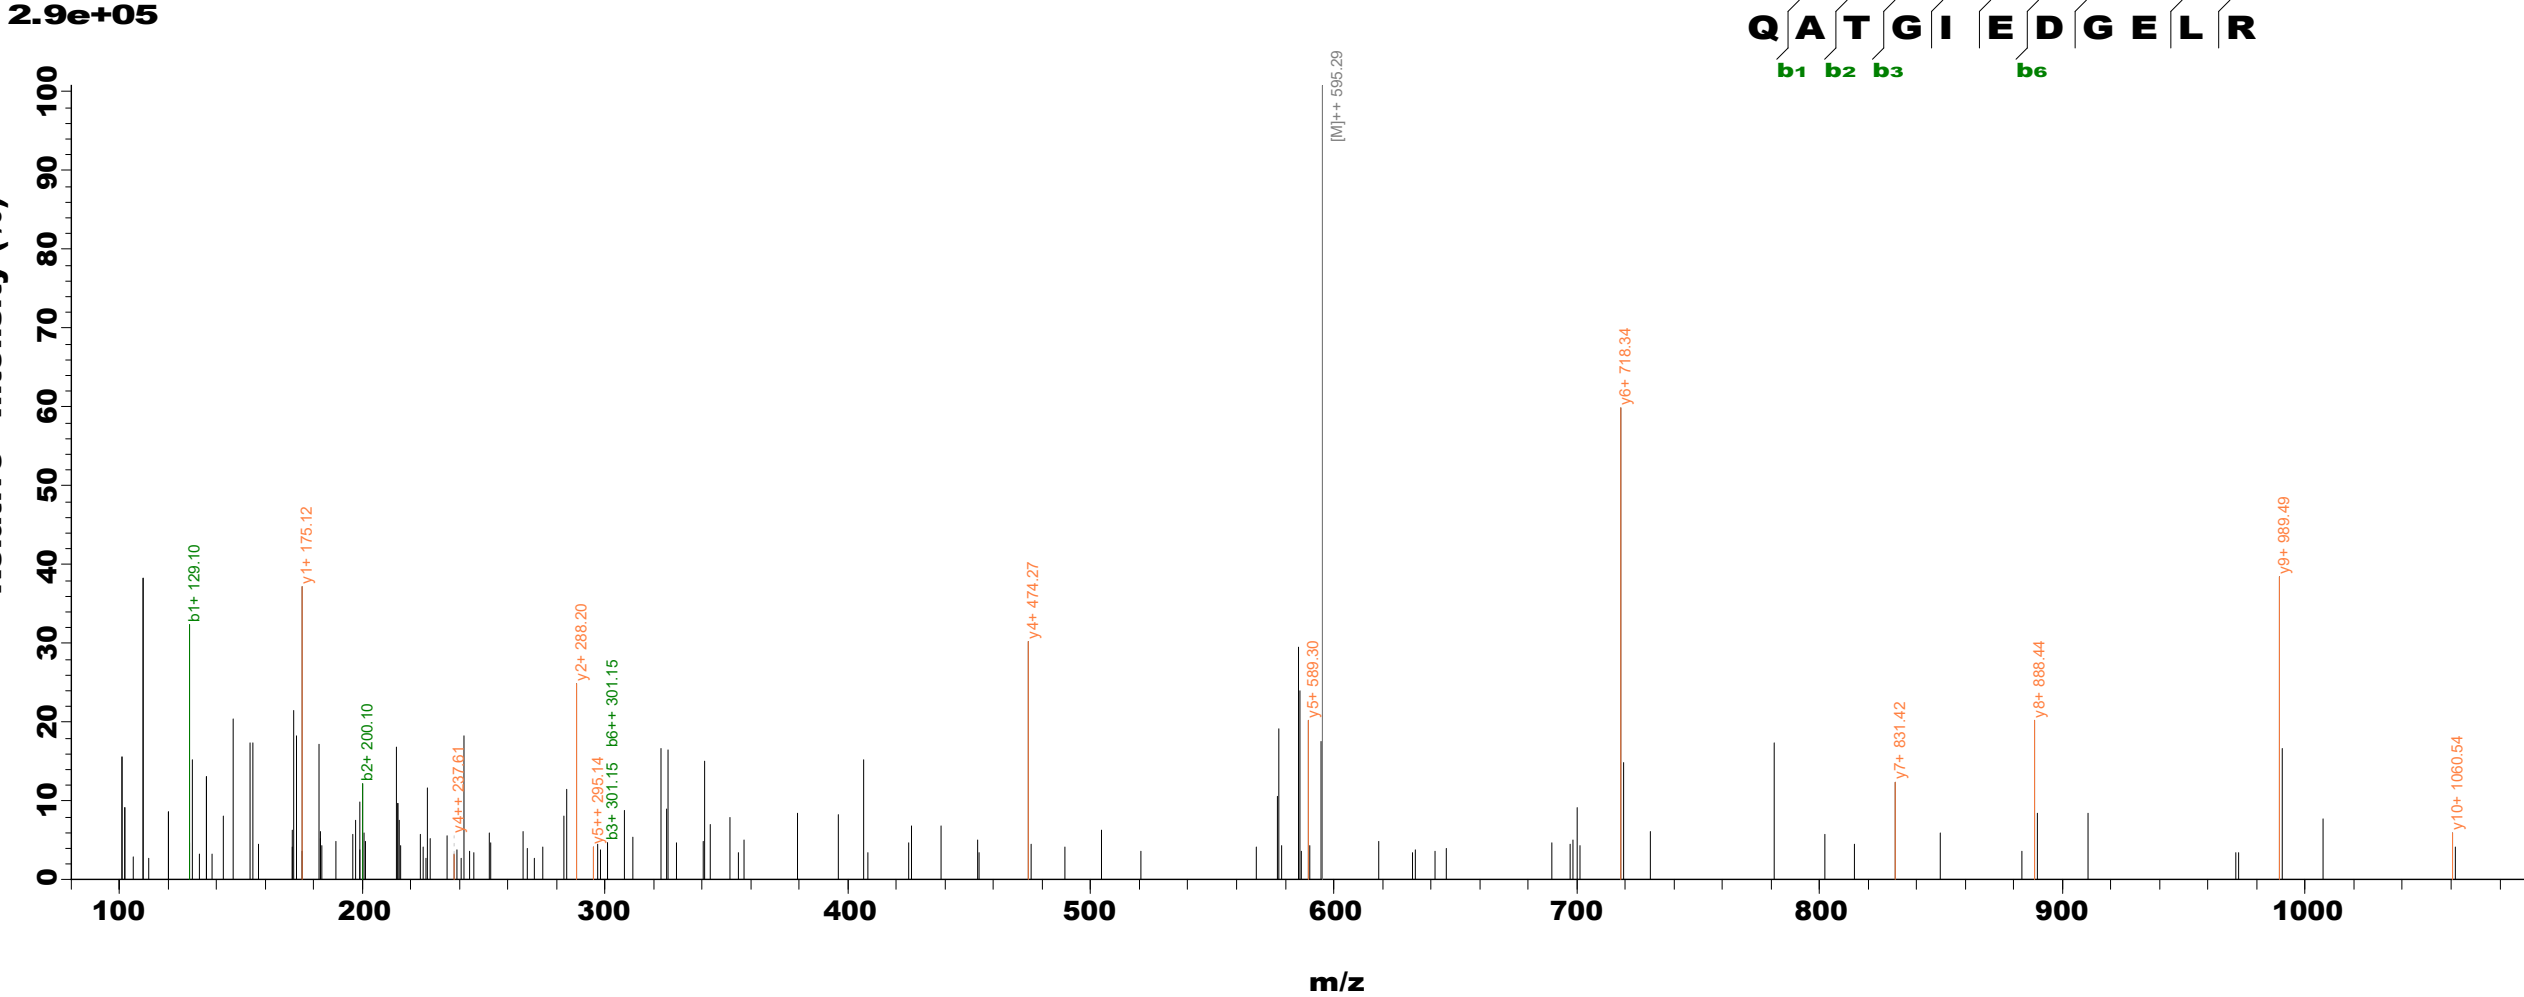

Supplement: Supplementary file 1 [file 41348994]
